# Supplementary material for: Considerations on the Controlled Delivery of Bioactive Compounds through Hyaluronic Acid Membrane
Source: MDPI journal article supplement (doi:10.3390/membranes12030303), 2022-03-08
Supplement: s1 [file s1]

# Supplementary Material

## Considerations on the controlled delivery of bioactive compounds through hydrogel membrane

**Eugenia Eftimie Totu<sup>1,\*</sup>, Daniela Manuc<sup>2,\*</sup>, Tiberiu Totu<sup>3</sup>, Corina Marilena Cristache<sup>4</sup>, Roxana-Mădălina Buga<sup>3</sup>, Fatih Erci<sup>5</sup>, Camelia Cristea<sup>6</sup>, Ibrahim Isildak<sup>7</sup>**

Department of Analytical Chemistry and Environmental Engineering, University Politehnica of Bucharest, 1-7 Polizu St., 011061 Bucharest, Romania; eugenia.totu@upb.ro

Department of Public Health, Faculty of Dental Medicine, "Carol Davila" University of Medicine and Pharmacy, 8 Eroii Sanitari Blvd, 050474 Bucharest, Romania; daniela.manuc@umfcd.ro

School of Life Sciences, Ecole Polytechnique Fédérale de Lausanne (EPFL), Route Cantonale, 1015 Lausanne, Switzerland; titotu@student.ethz.ch; rm.buga@yahoo.com

Department of Dental Techniques, Faculty of Midwifery and Nursing (FMAM), "Carol Davila" University of Medicine and Pharmacy, 8 Eroii Sanitari Blvd, 050474 Bucharest, Romania, corina.cristache@umfcd.ro

Department of Biotechnology, Faculty of Science, Necmettin Erbakan University, Meram-Konya, Turkey; ferci@erbakan.edu.tr

Biotechnologies Center, University of Agriculture and Veterinary Medicine, 42 Blvd. Mărăști, 011464 Bucharest, Romania; camelia\_crst@yahoo.com

Department of Bioengineering, Yildiz Technical University, Istanbul, Turkey; iisildak@yahoo.com

Correspondence: daniela.manuc@umfcd.ro, eugenia.totu@upb.ro

The present Supplementary Material comprises thermal analysis investigations, FTIR, fluorescence, and UV spectrophotometry analysis that support the main manuscript. Also, are introduced images from the microbiological assessment performed.

|                |           |                                                                                                                                                                                                 |              |       |         |     |   |                |    |     |    |       |            |
|----------------|-----------|-------------------------------------------------------------------------------------------------------------------------------------------------------------------------------------------------|--------------|-------|---------|-----|---|----------------|----|-----|----|-------|------------|
| Module:        | TG/DTA    | Temperature Program:                                                                                                                                                                            | Comment:     |       |         |     |   |                |    |     |    |       |            |
| Data Name:     | ISILDAK-7 | <table border="0"> <tr> <td>Cel</td> <td>Cel</td> <td>Cel/min</td> <td>min</td> <td>s</td> </tr> <tr> <td>1<sup>o</sup></td> <td>25</td> <td>675</td> <td>20</td> <td>0 1.0</td> </tr> </table> | Cel          | Cel   | Cel/min | min | s | 1 <sup>o</sup> | 25 | 675 | 20 | 0 1.0 | Gasi: Azot |
| Cel            | Cel       | Cel/min                                                                                                                                                                                         | min          | s     |         |     |   |                |    |     |    |       |            |
| 1 <sup>o</sup> | 25        | 675                                                                                                                                                                                             | 20           | 0 1.0 |         |     |   |                |    |     |    |       |            |
| Sample Name:   | ISILDAK-7 |                                                                                                                                                                                                 | Pan: Keramik |       |         |     |   |                |    |     |    |       |            |
| Sample Weight: | 11.426 mg |                                                                                                                                                                                                 |              |       |         |     |   |                |    |     |    |       |            |

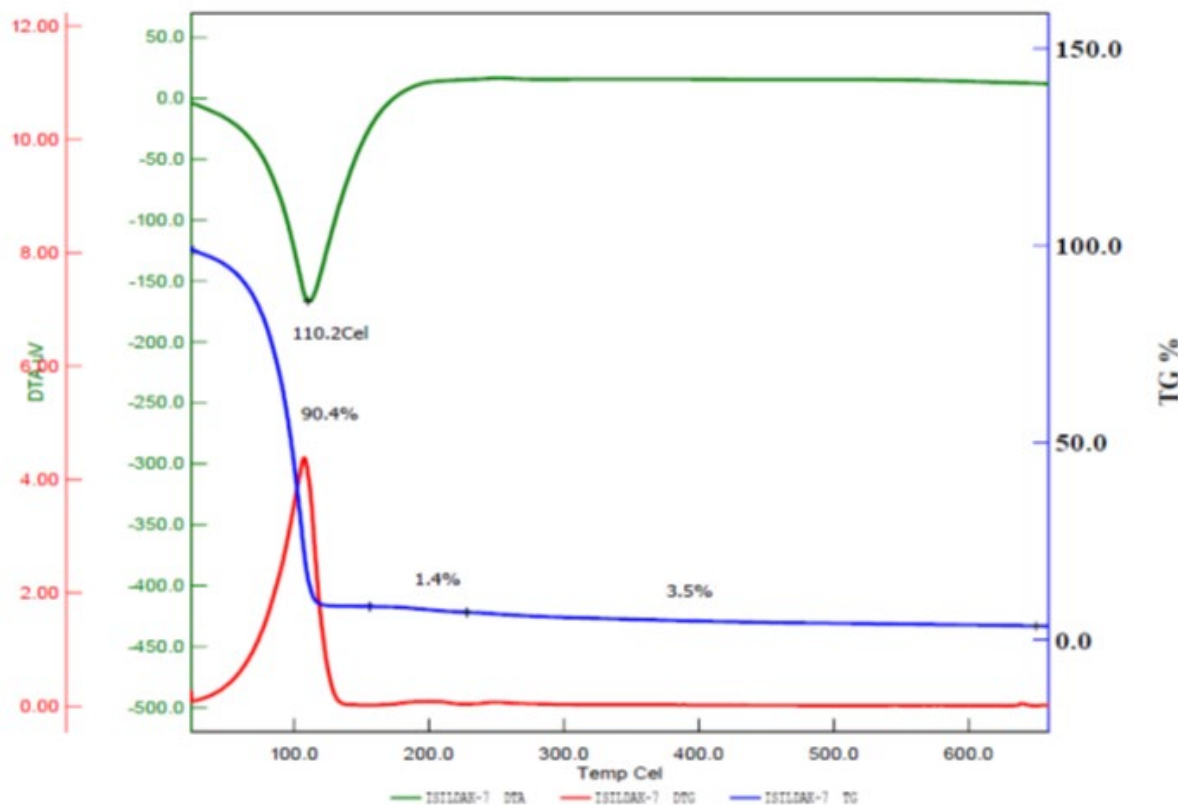

a.

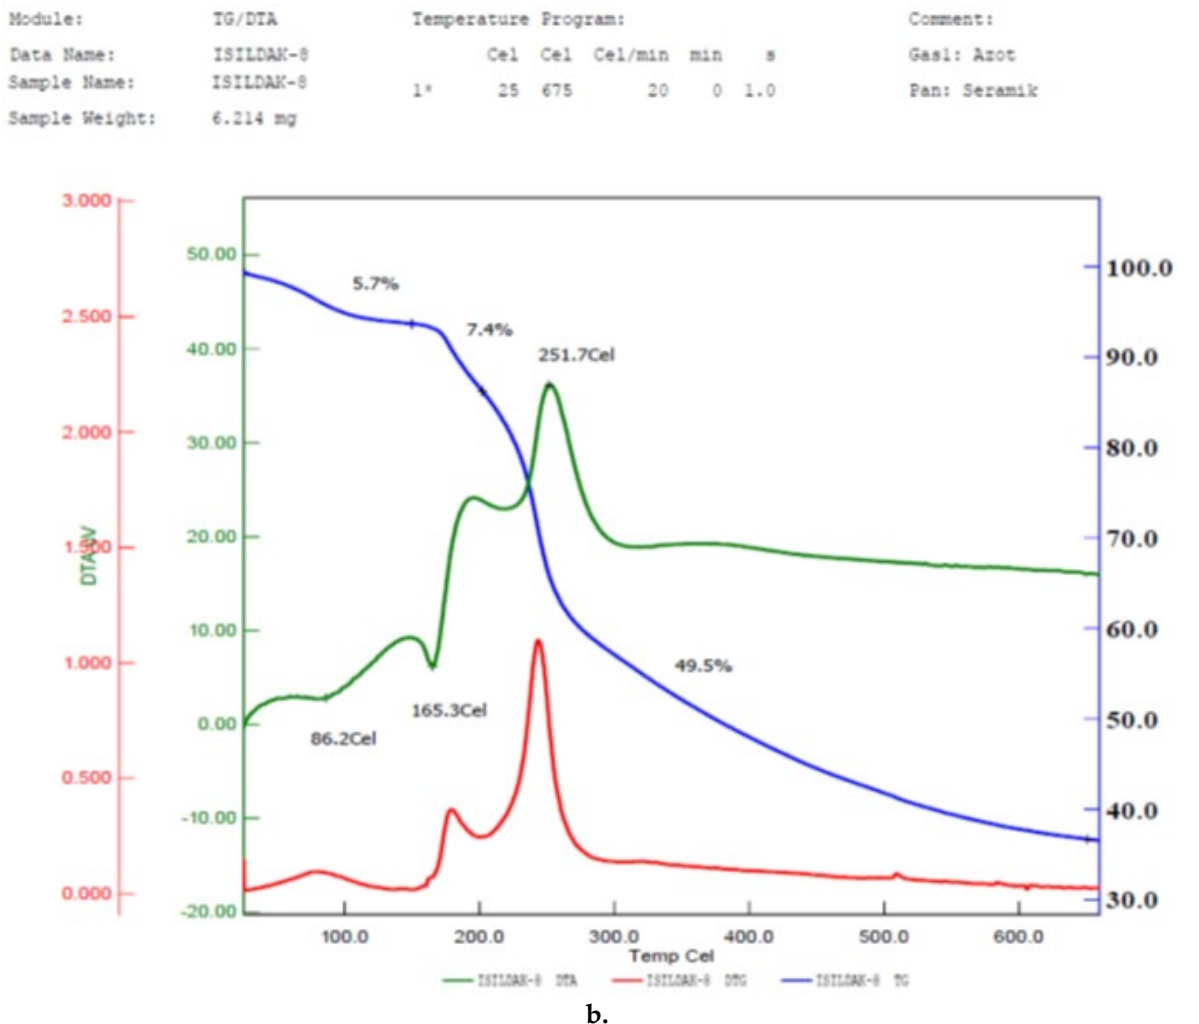

b.

Figure S1. Thermal analysis. a. HA complex matrix; b. solid complex mixture

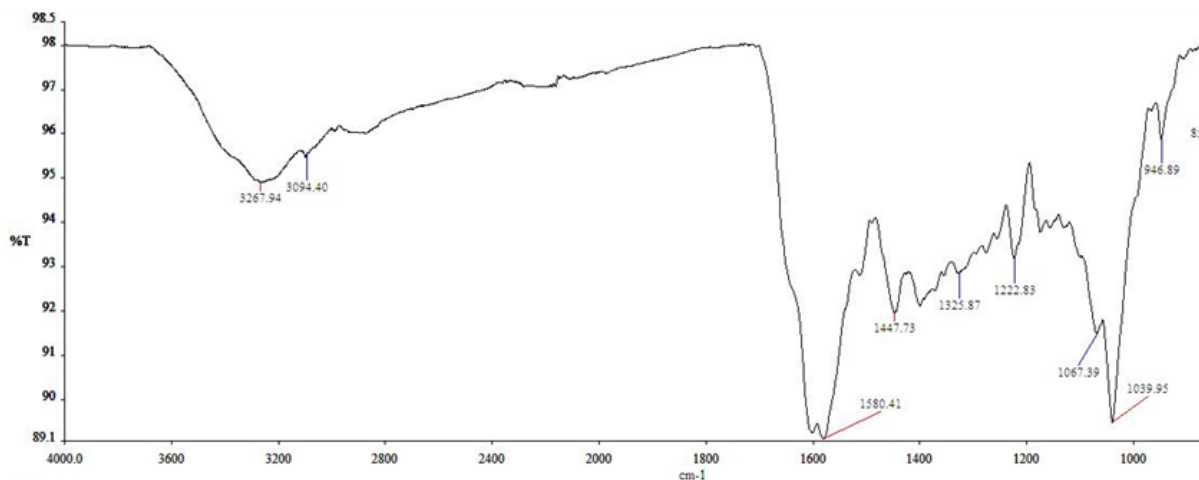

a.

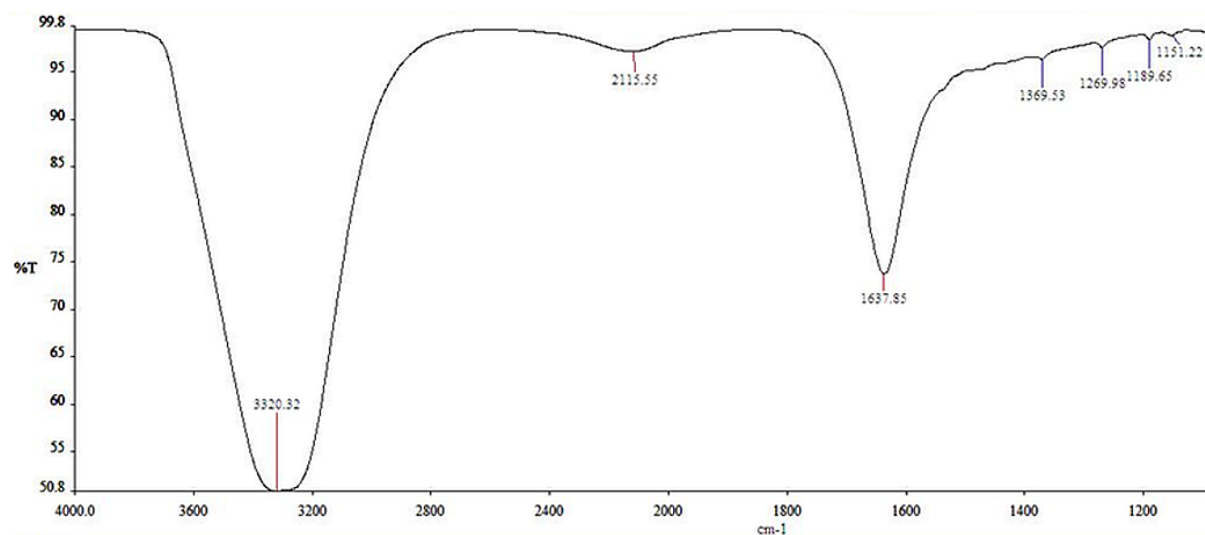

b.

**Figure S2.** FTIR spectra. a. solid complex mixture; b. HA matrix.

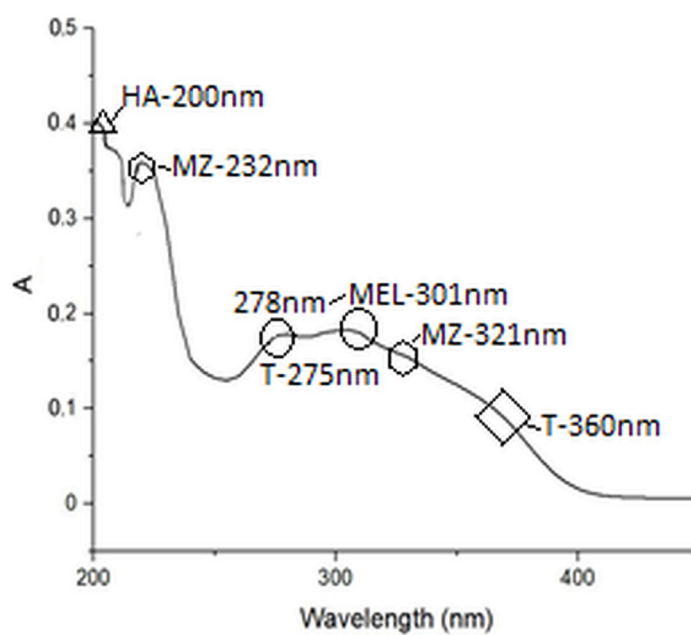

**Figure S3.** UV Spectrum for HA hydrogel form.

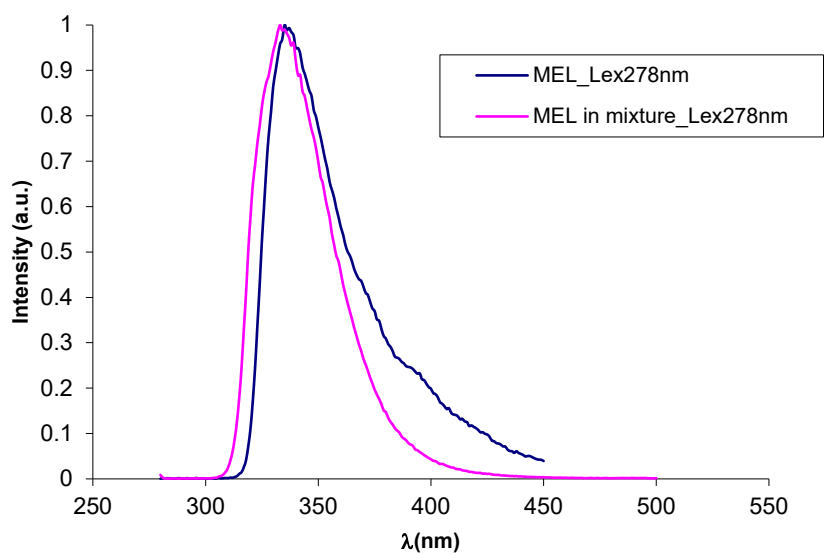

a.

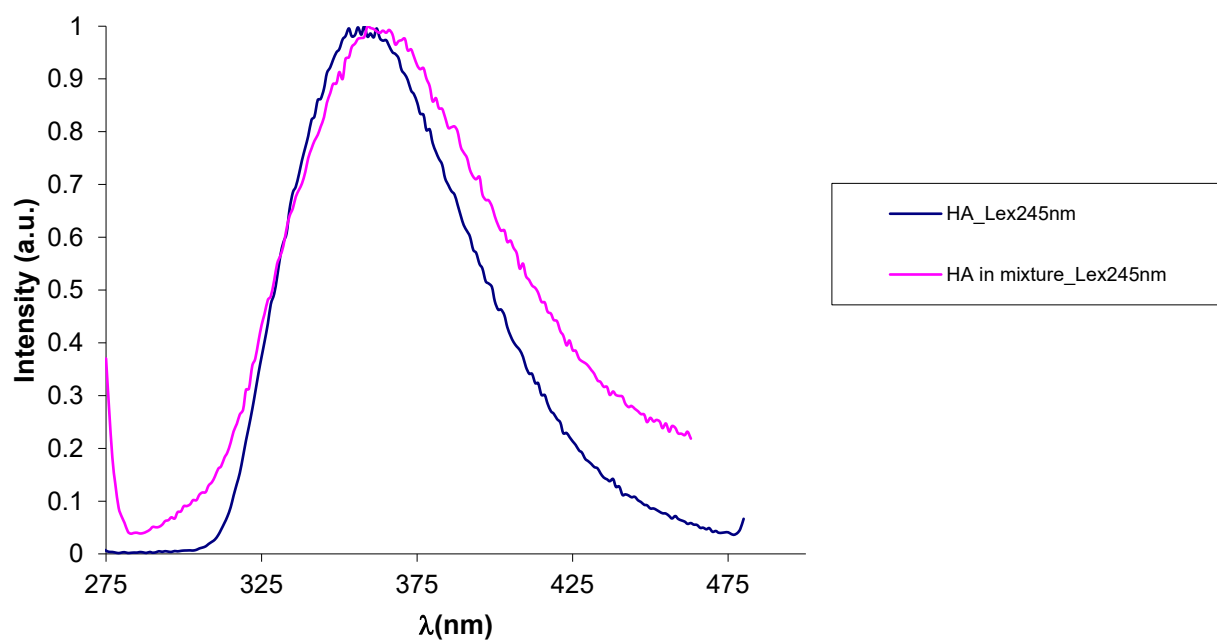

b.

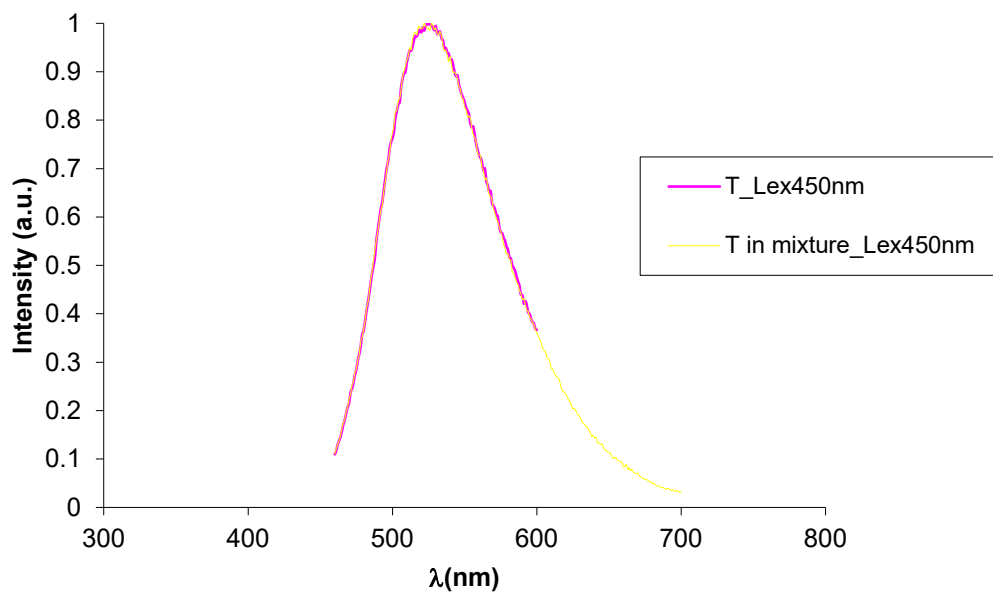

c.

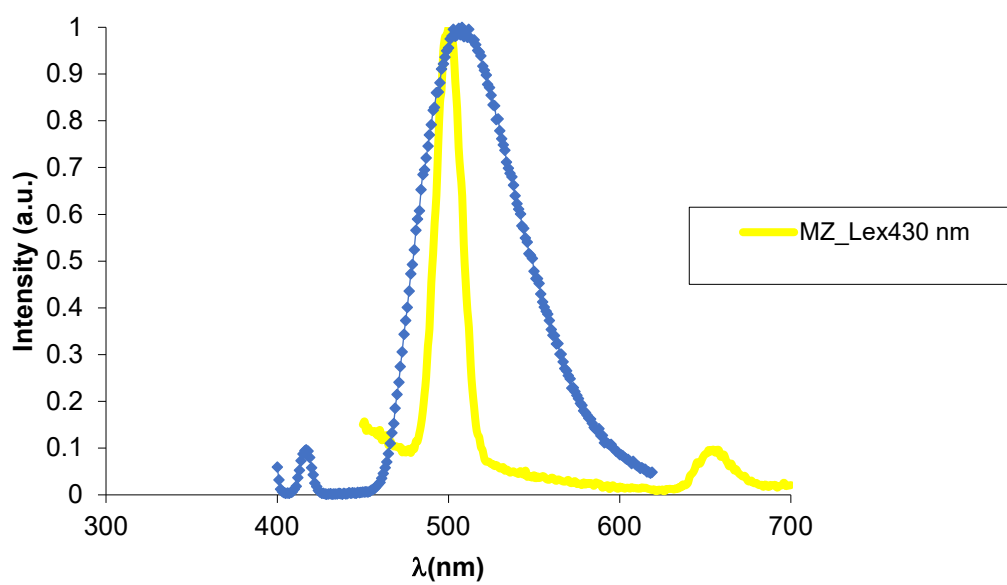

d.

**Figure S4.** Fluorescence spectra (detailed) for each component: individually and in complex mixture:  
a. melatonin-MEL; b. hyaluronic acid-HA; c. metronidazole-MZ; d. tetracycline-T.

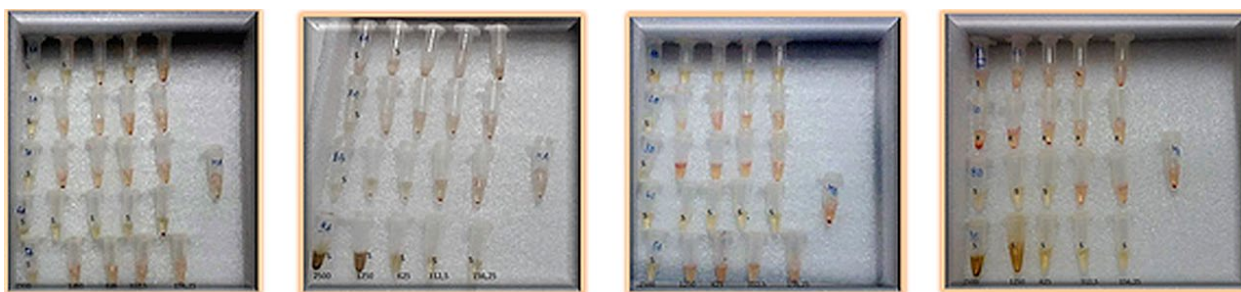

a.

b.

c.

d.

**Figure S5.** The action of the microbial agents on the systems based on the bioactive formulation.

a. *Staphylococcus* spp. 1-5; b. *Staphylococcus* spp. 6-9; c. *Streptococcus* spp. 1-5; d. *Streptococcus* spp. 6-9.

The notations 1 to 9 correspond to 1- Tetracycline, Metronidazole, Soft paraffin; 2- Melatonin, Hyaluronic Acid, Soft paraffin; 3- Melatonin, Hyaluronic Acid – solid sample; 4- Metronidazole, Tetracycline, Melatonin, Hyaluronic Acid matrix; 5-Soft paraffin; 6- Hyaluronic Acid; 7- Melatonin; 8- Metronidazole; 9-Tetracycline.
